# Supplementary material for: Morphological and molecular characterization of Chnoospora minima (Scytosiphonaceae, Ectocarpales) along Mexican coasts, with the description of C. ramosissima sp. nov.
Source: publisher site journal article supplement (doi:10.1515/bot-2024-0067), 2025-02-24
Supplement: Supplementary file 1 [file j_bot-2024-0067_suppl_001.docx]

**Supplementary Material**

**Morphological and molecular characterization of *Chnoospora minima* (Scytosiphonaceae, Ectocarpales) along Mexican coasts, with the description of *C. ramosissima* sp. nov.**

María Luisa Núñez Resendiz et al.

DOI 10.1515/bot-2024-0067

**Supplementary Table S1:** Molecular sequences from GenBank used in this study.

| **Specimen** | **Collection data (country: site; date; collector** | **GenBank accession number** | |
| --- | --- | --- | --- |
|  |  | ***Cox*3** | ***rbc*L** |
| *Chnoospora mínima* (Hering) Papenfuss | *rbc*L: Japan: Okinawa Pref., Yonaguni; 10-03-2000 |  | AB578986 |
| *rbc*L: USA: HI, Lanai, Polihua Beach; 27-03-2008 |  | AB578987 |
| *rbc*L: French Polynesia: Society Islands, *rbc*L: Tahiti; 18-04-2019; M. Zubia |  | OR591834 |
| *rbc*L: French Polynesia: Society Islands, *rbc*L: Tahiti; 24-03-2019; M. Zubia |  | OR591833 |
| *Chordaria* *flagelliformis* (O.F. Müller) C. Agardh | *Cox*3: Germany; Schleimunde; A.F Peters *et* Bezhin Rosko | JF796553 | − |
| *Cladosiphon okamuranus* Tokida | *rbc*L: Japan: Okinawa | − | AB199631 |
| *Colpomenia borea* Dy, M. Hoshino, T. Abe, Yotsukura, K.M. Lee, S.M. Boo, N. Klochkova *et* Kogame | *rbc*L: Russia; Kogame,K., Abe,T. | − | LC493039 |
| *C. claytoniae* S.M. Boo, K.M. Lee, G.Y. Cho *et* W. Nelson | *Cox*3: Korea: Hupo, Uljin;10-Apr-2001 | HQ833783 | − |
| *C. expansa* (D.A. Saunders) Y.-P. Lee | *Cox*3: Korea: Chujado; 26-May-2009 | HQ833780 | − |
| *C. peregrina* Sauvageau | Cox3: Korea: Gangreung; 23-Feb-1999 | HQ833767 | AB022235 |
| *Dactylosiphon bullosus* (D.A. Saunders) Santiañez, K.M. Lee, S.M. Boo *et* Kogame | *Cox*3: Australia: Melbourne; 18-Dec-2010. | JQ918797 | KF985958 |
| *rbc*L: Japan: Hokkaido; 15-Feb-1991 |  | AB022236 |
| *D. durvillei* (Bory) Santiañez, K.M. Lee, S.M. Boo *et* Kogame | *Cox*3*:* Mexico: Sonora; 31-Mar-2009 | JQ918801 | AB022237 |
| *D. wynnei* (K.M. Lee, R. Riosmena-Rodriguez, Kogame *et* S.M. Boo) Santiañez, K.M. Lee, S.M. Boo *et* Kogame | *Cox*3*:* Korea | KF700280 | − |
| *Ectocarpus siliculosus* (Dillwyn) Lyngbye | *rbc*L: Australia | FP885846 | AY307410 |
| *Hapterophycus canaliculatus*Setchell *et* N.L.Gardner | − | KF700321 | − |
| *Hydroclathrus clathratus* (C. Agardh) M. Howe | *Cox*3: Japan: Sakurajima, Kagoshima; 29-Mar-2006  *rbc*L: Japan: Sakurajima, Kagoshima; 29-03-2006 | MF431998 | MF431949 |
| *H. rapanuii* Santiañez, Macaya *et* Kogame | *Cox*3: Chile: Vaihu, Easter Island;  20-Mar-2016 | MG450661 | − |
| *H. tenuis* C.K. Tseng *et* Lu Baroen | *rbc*L: Philippin s: Batac, Ilos Cortes. *Cox*3: Japan: Sumuide, Okinawa; 28-Apr-2013 | MF431997 | DQ239770 |
| *Iyengaria stellata* (Børgesen) Børgesen | *rbc*L: South Africa: Knysna, Western Cape; 11-12-2012 |  | MT773447 |
| *Manzaea minuta* (Santiañez *et* Kogame) Santiañez *et* Kogame | *Cox*3: Japan: Senaga, Naha, Okinawa; 30-Mar-2009 | MF432005 | − |
| *Melanosiphon intestinalis* (De A. Saunders) M.J. Wynne | *Cox*3:Canada: New Brunswick; Jan 11, 2007. *rbc*L: Japan | KM587022 | LC472401 |
|  | LC472400 |
| *Myelophycus simplex* (Harvey) Papenfuss | *rbc*L: Hiroshi Kawai | KF700323 | LC472397 |
| *M. cavus* Tanaka et Chihara | − | KF700315 | − |
| *Petalonia fascia* (O.F. Müller) Kuntze | *Cox*3: Korea: Jejudo | HQ833766 | − |
| *P. tenella* (Kogame) Santiañez *et* Kogame | *Cox*3: Chile: Caleta Palito; Jul-2007. *rbc*L: Japan | GU252554 | AB022241 |
| *P. binghamiae* (J. Agardh) K.L. Vinogradova | *−* | KF700317 | − |
| *Pylaiella littoralis* (Linnaeus) Kjellman | − | NC003055 | − |
| *Py. tenuis* Matsumoto *et* Shimada | *rbc*L: Japan: Kanagawa, Hayama, Isshiki; 30-12-2010 |  | AB860192 |
| *Planosiphon complanatus* (Rosenvinge) McDevit *et* G.W. Saunders | *rbc*L: Japan: Hokkaido, Samani; 19-05-1991 |  | LC490562 |
| *Pl. gracilis* (Kogame) McDevit *et* G.W. Saunders | *rbc*L: Canada | KF700323 | AB022240 |
| *Pl. zosterifolius* (Reinke) McDevit *et* G.W. Saunders | *rbc*L: Canada: New Brunswick,  Bay of Fundy |  | KF281387 |
|  | AF207807 |
| *Pseudochnoospora implexa* (J. Agardh) Santiañez, G.Y. Cho *et* Kogame | *Cox*3: French Polynesia: Society Islands, Tahiti; 14-Nov-2022; M. Zubia. *rbc*L: French Polynesia: Society Islands, Tahiti; 21-Jun-2028; T. Theophilus | OR591797 | OR591872 |
| − | GQ368273 | GQ368316 |
|  | − | − | AB022231 |
| *Rosenvingea endiviifolia* (Martius) M.J. Wynne | *Cox*3: Mexico: La Paz; 31- Mar-2009 | KM587011 | AB022232 |
| *Scytosiphon arcanus* M. Hoshino *et* Kogame | *rbc*L: Japan: Hokkaido, Otaru, Oshoro; 25-Oct-1988; Kazuhiro Kogame |  | LC517923 |
| *S. dotyi* M.J. Wynne | *rbc*L: USA: Monterey, CA | KF700322 | DQ239771 |
| *S. lomentaria (Lyngbye) Link* | *Cox*3: Korea; Chujado; 23-May-2005 | HQ833765 | − |
| *S. promiscuous* McDevit *et* G.W. Saunders | *rbc*L: Japan: Hokkaido, Muroran; 10-03-2000; Kazuhiro Kogame |  | LC517920 |
| *S. tosaensis* M. Hoshino *et* Kogame | *rbc*L: Japan: Kochi Pref., Usa, Inoshiri; 29-03-2018; Masakazu Hoshino |  | LC517921 |
| *Tronoella ryukyuana* Santiañez *et* Kogame | Japan: Odo, Itoman, Okinawa; 28-Mar-2009 | MF432011 | MF431947 |

**Supplementary Table S2:** Genetic *p* distances values, calculated in MEGA X, for sequences of *Chnoospora* generated in this study with *Cox*3 marker and those from the GenBank.

|  |  | | **1** | **2** | **3** | **4** | **5** | **6** | **7** | **8** | **9** | **10** | **11** | **12** | **13** | **14** | **15** | **16** | **17** | **18** | **19** |
| --- | --- | --- | --- | --- | --- | --- | --- | --- | --- | --- | --- | --- | --- | --- | --- | --- | --- | --- | --- | --- | --- |
| **1** | *Chnoospora minima* Japan KF700277 | |  |  |  |  |  |  |  |  |  |  |  |  |  |  |  |  |  |  |  |
| **2** | *C. minima* Brazil PQ204668 | **C** | 0.004 |  |  |  |  |  |  |  |  |  |  |  |  |  |  |  |  |  |  |
| **3** | *C. minima* Brazil PQ204669 | **C** | 0.004 | 0.000 |  |  |  |  |  |  |  |  |  |  |  |  |  |  |  |  |  |
| **4** | *C. minima* Mexico PQ204662 | **C** | 0.004 | 0.000 | 0.000 |  |  |  |  |  |  |  |  |  |  |  |  |  |  |  |  |
| **5** | *C. minima* Mexico PQ204663 | **C** | 0.004 | 0.000 | 0.000 | 0.000 |  |  |  |  |  |  |  |  |  |  |  |  |  |  |  |
| **6** | *C. minima* Mexico PQ204665 | **C** | 0.004 | 0.000 | 0.000 | 0.000 | 0.000 |  |  |  |  |  |  |  |  |  |  |  |  |  |  |
| **7** | *C. minima* Mexico PQ204664 | **C** | 0.004 | 0.000 | 0.000 | 0.000 | 0.000 | 0.000 |  |  |  |  |  |  |  |  |  |  |  |  |  |
| **8** | *C. minima* Mexico PQ204666 | **C** | 0.004 | 0.000 | 0.000 | 0.000 | 0.000 | 0.000 | 0.000 |  |  |  |  |  |  |  |  |  |  |  |  |
| **9** | *C. minima* Mexico PQ204667 | **C** | 0.004 | 0.000 | 0.000 | 0.000 | 0.000 | 0.000 | 0.000 | 0.000 |  |  |  |  |  |  |  |  |  |  |  |
| **10** | *C. ramosissima* Mexico PQ204659 | **A** | 0.051 | 0.051 | 0.051 | 0.051 | 0.051 | 0.051 | 0.051 | 0.051 | 0.051 |  |  |  |  |  |  |  |  |  |  |
| **11** | *C. ramosissima* Mexico PQ204660 | **A** | 0.051 | 0.051 | 0.051 | 0.051 | 0.051 | 0.051 | 0.051 | 0.051 | 0.051 | 0.000 |  |  |  |  |  |  |  |  |  |
| **12** | *C. ramosissima* Mexico PQ204661 | **A** | 0.051 | 0.051 | 0.051 | 0.051 | 0.051 | 0.051 | 0.051 | 0.051 | 0.051 | 0.000 | 0.000 |  |  |  |  |  |  |  |  |
| **13** | *C. ramosissima* Mexico PQ568256 | **A** | 0.051 | 0.051 | 0.051 | 0.051 | 0.051 | 0.051 | 0.051 | 0.051 | 0.051 | 0.000 | 0.000 | 0.000 |  |  |  |  |  |  |  |
| **14** | *C. ramosissima* Mexico PQ568257 | **A** | 0.051 | 0.051 | 0.051 | 0.051 | 0.051 | 0.051 | 0.051 | 0.051 | 0.051 | 0.000 | 0.000 | 0.000 | 0.000 |  |  |  |  |  |  |
| **15** | *C. ramosissima* Mexico PQ568259 | **A** | 0.051 | 0.051 | 0.051 | 0.051 | 0.051 | 0.051 | 0.051 | 0.051 | 0.051 | 0.000 | 0.000 | 0.000 | 0.000 | 0.000 |  |  |  |  |  |
| **16** | *C. minima* Chile MG570401 | **B** | 0.017 | 0.017 | 0.017 | 0.017 | 0.017 | 0.017 | 0.017 | 0.017 | 0.017 | 0.041 | 0.041 | 0.041 | 0.041 | 0.041 | 0.041 |  |  |  |  |
| **17** | *C. minima* MG570400 Chile | **B** | 0.017 | 0.017 | 0.017 | 0.017 | 0.017 | 0.017 | 0.017 | 0.017 | 0.017 | 0.041 | 0.041 | 0.041 | 0.041 | 0.041 | 0.041 | 0.000 |  |  |  |
| **18** | *C. minima* MG570399 Chile | **B** | 0.017 | 0.017 | 0.017 | 0.017 | 0.017 | 0.017 | 0.017 | 0.017 | 0.017 | 0.041 | 0.041 | 0.041 | 0.041 | 0.041 | 0.041 | 0.000 | 0.000 |  |  |
| **19** | *C. minima* FrenchPolynesia OR591766 | **B** | 0.021 | 0.021 | 0.021 | 0.021 | 0.021 | 0.021 | 0.021 | 0.021 | 0.021 | 0.041 | 0.041 | 0.041 | 0.041 | 0.041 | 0.041 | 0.004 | 0.004 | 0.004 |  |
| **20** | *C. minima* FrenchPolynesia OR591765 | **B** | 0.024 | 0.024 | 0.024 | 0.024 | 0.024 | 0.024 | 0.024 | 0.024 | 0.024 | 0.043 | 0.043 | 0.043 | 0.043 | 0.043 | 0.043 | 0.006 | 0.006 | 0.006 | 0.002 |

**Supplementary Table S3:** Genetic *p* distances values, calculated in MEGA X, for sequences of *Chnoospora* generated in this study with *rbc*L marker and those from the GenBank.

|  |  | | **1** | **2** | **3** | **4** | **5** | **6** | **7** | **8** | **9** | **10** | **11** | **12** | **13** | **14** | **15** | **16** | **17** | **18** | **19** |  |
| --- | --- | --- | --- | --- | --- | --- | --- | --- | --- | --- | --- | --- | --- | --- | --- | --- | --- | --- | --- | --- | --- | --- |
| **1** | *Chnoospora minima* AB578986 **B** | |  |  |  |  |  |  |  |  |  |  |  |  |  |  |  |  |  |  |  |  |
| **2** | *C. minima* AB578987 | **B** | 0.001 |  |  |  |  |  |  |  |  |  |  |  |  |  |  |  |  |  |  |  |
| **3** | *C. mínima* PQ204670 | **B** | 0.001 | 0.002 |  |  |  |  |  |  |  |  |  |  |  |  |  |  |  |  |  |  |
| **4** | *C. mínima* PQ204671 | **B** | 0.001 | 0.002 | 0.000 |  |  |  |  |  |  |  |  |  |  |  |  |  |  |  |  |  |
| **5** | *C. minima* OR591834 | **C** | 0.005 | 0.005 | 0.005 | 0.005 |  |  |  |  |  |  |  |  |  |  |  |  |  |  |  |  |
| **6** | *C. minima* OR591833 | **C** | 0.005 | 0.005 | 0.005 | 0.005 | 0.000 |  |  |  |  |  |  |  |  |  |  |  |  |  |  |  |
| **7** | *C. mínima* PP849834 | **C** | 0.004 | 0.005 | 0.005 | 0.005 | 0.001 | 0.001 |  |  |  |  |  |  |  |  |  |  |  |  |  |  |
| **8** | *C. mínima* PP849835 | **C** | 0.004 | 0.005 | 0.005 | 0.005 | 0.001 | 0.001 | 0.000 |  |  |  |  |  |  |  |  |  |  |  |  |  |
| **9** | *C. mínima* PP849836 | **C** | 0.004 | 0.005 | 0.005 | 0.005 | 0.001 | 0.001 | 0.000 | 0.000 |  |  |  |  |  |  |  |  |  |  |  |  |
| **10** | *C. mínima* PP849837 | **C** | 0.004 | 0.005 | 0.005 | 0.005 | 0.001 | 0.001 | 0.000 | 0.000 | 0.000 |  |  |  |  |  |  |  |  |  |  |  |
| **11** | *C. mínima* PP849840 | **C** | 0.005 | 0.005 | 0.005 | 0.005 | 0.000 | 0.000 | 0.001 | 0.001 | 0.001 | 0.001 |  |  |  |  |  |  |  |  |  |  |
| **12** | *C. mínima* PP849841 | **C** | 0.005 | 0.005 | 0.005 | 0.005 | 0.000 | 0.000 | 0.001 | 0.001 | 0.001 | 0.001 | 0.000 |  |  |  |  |  |  |  |  |  |
| **13** | *C. mínima* PP849838 | **C** | 0.004 | 0.005 | 0.005 | 0.005 | 0.001 | 0.001 | 0.000 | 0.000 | 0.000 | 0.000 | 0.001 | 0.001 |  |  |  |  |  |  |  |  |
| **14** | *C. mínima* PP849839 | **C** | 0.004 | 0.005 | 0.005 | 0.005 | 0.001 | 0.001 | 0.000 | 0.000 | 0.000 | 0.000 | 0.001 | 0.001 | 0.000 |  |  |  |  |  |  |  |
| **15** | *C. mínima* PQ568254 | **C** | 0.004 | 0.005 | 0.005 | 0.005 | 0.001 | 0.001 | 0.000 | 0.000 | 0.000 | 0.000 | 0.001 | 0.001 | 0.000 | 0.000 |  |  |  |  |  |  |
| **16** | *C. ramosissima* PP849832 | **A** | 0.008 | 0.009 | 0.009 | 0.009 | 0.010 | 0.010 | 0.009 | 0.009 | 0.009 | 0.009 | 0.010 | 0.010 | 0.009 | 0.009 | 0.009 |  |  |  |  |  |
| **17** | *C. ramosissima* PP849833 | **A** | 0.008 | 0.009 | 0.009 | 0.009 | 0.010 | 0.010 | 0.009 | 0.009 | 0.009 | 0.009 | 0.010 | 0.010 | 0.009 | 0.009 | 0.000 | 0.000 |  |  |  |  |
| **18** | *C. ramosissima* PQ568252 | **A** | 0.008 | 0.009 | 0.009 | 0.009 | 0.010 | 0.010 | 0.009 | 0.009 | 0.009 | 0.009 | 0.010 | 0.010 | 0.009 | 0.009 | 0.000 | 0.000 | 0.000 |  |  |  |
| **19** | *C. ramosissima* PQ568253 | **A** | 0.008 | 0.009 | 0.009 | 0.009 | 0.010 | 0.010 | 0.009 | 0.009 | 0.009 | 0.009 | 0.010 | 0.010 | 0.009 | 0.009 | 0.000 | 0.000 | 0.000 | 0.000 |  |  |
| **20** | *Ch. ramosissima* PQ568255 | **A** | 0.008 | 0.009 | 0.009 | 0.009 | 0.010 | 0.010 | 0.009 | 0.009 | 0.009 | 0.009 | 0.010 | 0.010 | 0.009 | 0.009 | 0.000 | 0.000 | 0.000 | 0.000 | 0.000 |  |
